# Supplementary material for: Gut Microbiota Alterations and Their Functional Differences in Depression According to Enterotypes in Asian Individuals
Source: MDPI journal article supplement (doi:10.3390/ijms241713329), 2023-08-28

# Supplementary Table

Table S1. Information on the studies included in the meta-analysis

| Accession number | Design       | Sample grouping                                                            | Country | Sampling                                        | DNA extraction                              | 16S region | Seq Tech       |
|------------------|--------------|----------------------------------------------------------------------------|---------|-------------------------------------------------|---------------------------------------------|------------|----------------|
| PRJNA838414      | Case–control | PSD;26 Health: 30                                                          | China   | NA                                              | Fecal genomic DNA by the CTAB/SDS method.   | V3-V4      | Illumina MiSeq |
| PRJNA776170      | Case–control | Health:44<br>MDD;24                                                        | China   | Immediately frozen stool sample (2 g) at –80°C. | Fecal DNA by the QIAamp® DNA Stool Mini Kit | V3-V4      | Illumina MiSeq |
| PRJEB23500       | Case–control | Health:47<br>BD;72                                                         | China   | NA                                              | MiSeq 600 cycle v3 kit                      | V3-4       | Illumina MiSeq |
| PRJDB10562       | Case-control | Depression:246 with 3 point: antidepressant drug (no medication treatment) | China   | NA                                              | NA                                          | NA         | NA             |

PSD: Post-stroke depression; MDD: major depressive disorder; BD: depression with bipolar disorder; NA, non-applicable.

Table S2. Accuracy, sensitivity, specificity and precision in the prediction model generated with machine learning approach according to enterotypes

| ET-B          | AUROC       | Accuracy    | Sensitivity | Specificity | Precision   | F1          |
|---------------|-------------|-------------|-------------|-------------|-------------|-------------|
| XGBoost       | 0.810±0.003 | 0.807±0.002 | 0.935±0.002 | 0.632±0.005 | 0.776±0.003 | 0.844±0.002 |
| Random forest | 0.871±0.003 | 0.769±0.003 | 0.963±0.004 | 0.551±0.005 | 0.714±0.003 | 0.829±0.002 |
| Liner regress | 0.647±0.004 | 0.654±0.003 | 0.866±0.003 | 0.364±0.004 | 0.651±0.003 | 0.738±0.003 |

| ET-L          | AUROC       | Accuracy    | Sensitivity | Specificity | Precision   | F1          |
|---------------|-------------|-------------|-------------|-------------|-------------|-------------|
| XGBoost       | 0.934±0.001 | 0.828±0.002 | 0.961±0.002 | 0.499±0.005 | 0.825±0.002 | 0.886±0.001 |
| Random forest | 0.857±0.002 | 0.740±0.002 | 0.920±0.002 | 0.298±0.005 | 0.763±0.002 | 0.832±0.002 |
| Liner regress | 0.857±0.002 | 0.740±0.002 | 0.920±0.002 | 0.298±0.005 | 0.763±0.002 | 0.832±0.002 |

AUROC, area under the receiver operating characteristic.

Supplementary figures

Figure S1. Relative abundance of gut bacteria in family level according to each enterotypes

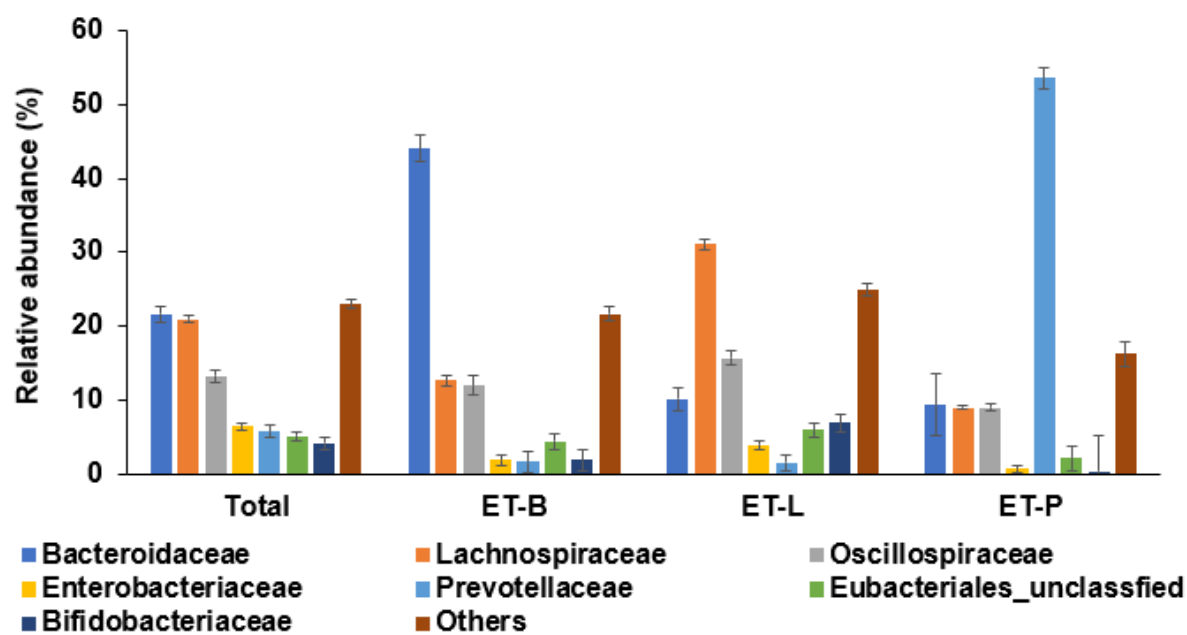

Figure S2. A-diversity of gut bacteria between the Healthy and Depressed (DP) groups according to enterotypes

A. All participants

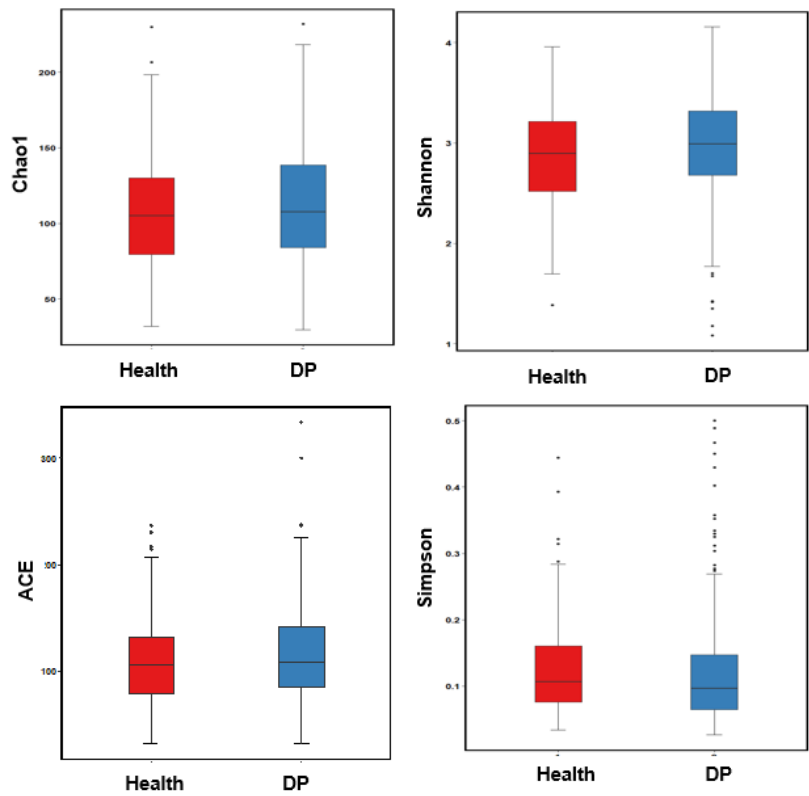

B. ET-B

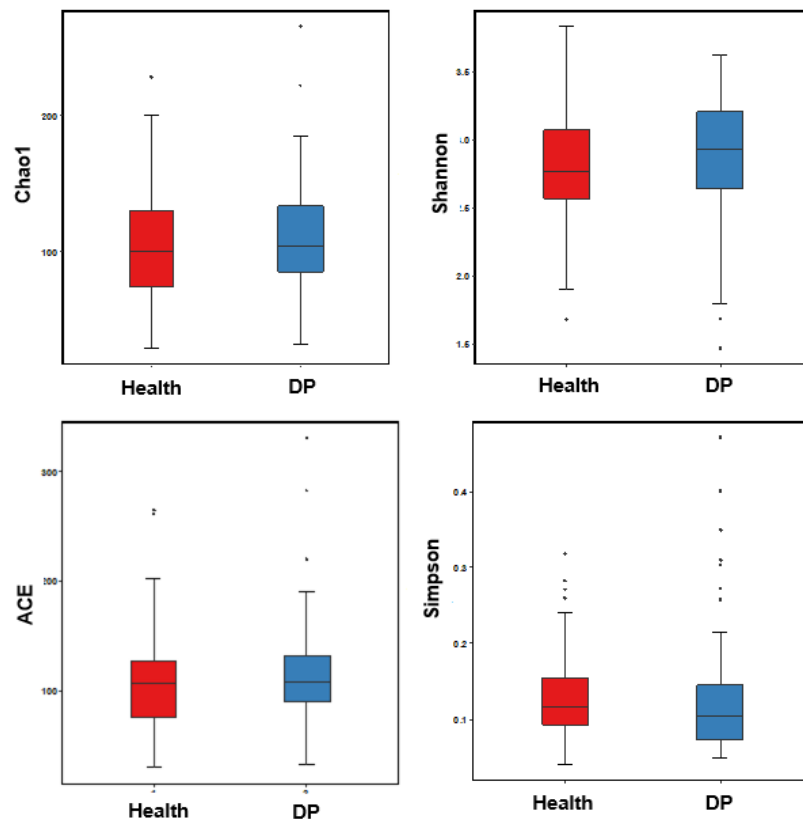

### C. ET-L

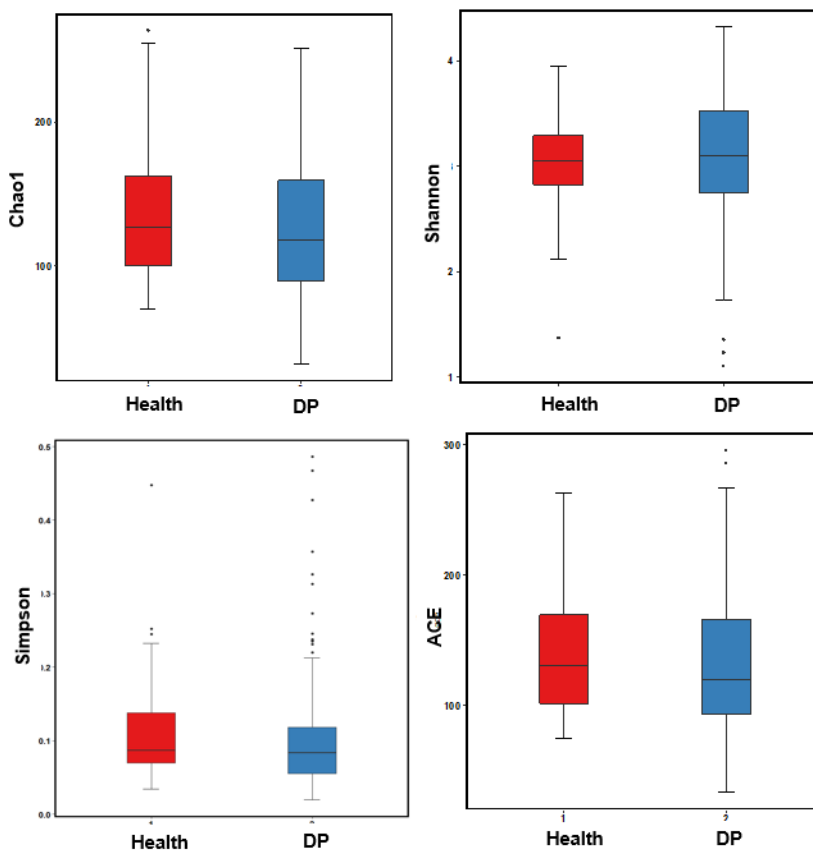

#### D. ET-P

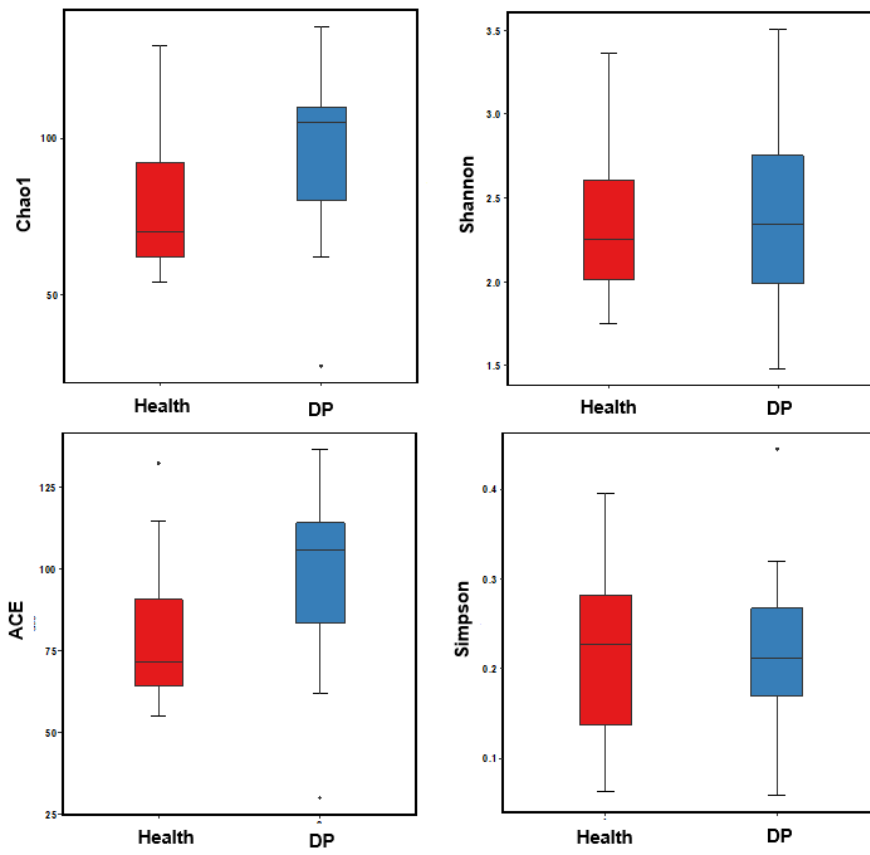

Figure S3. B-diversity of gut bacteria between the Healthy and Depressed (DP) groups according to enterotypes

A. All participants

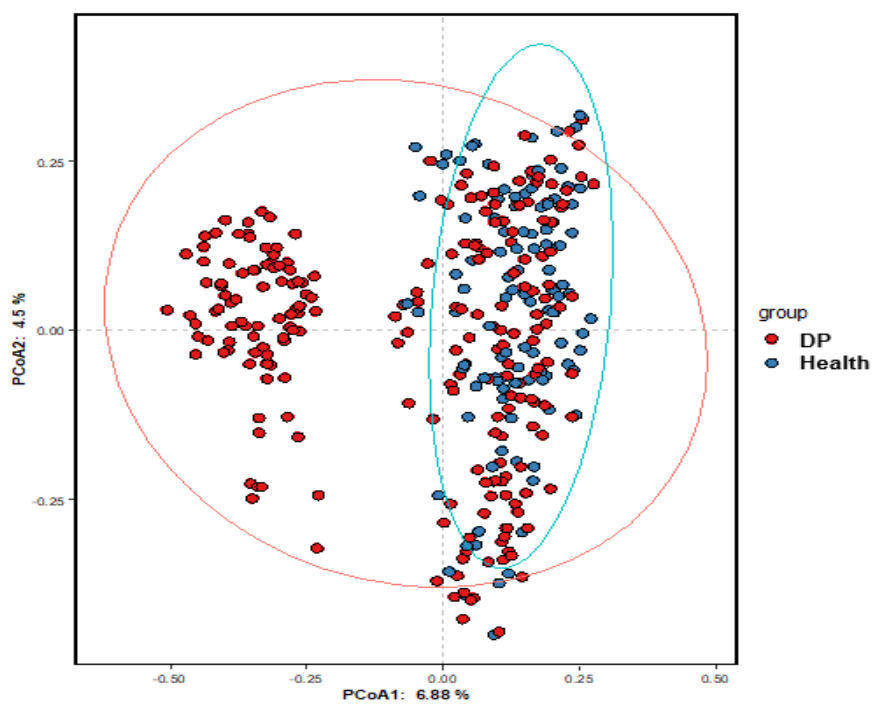

B. ET-B

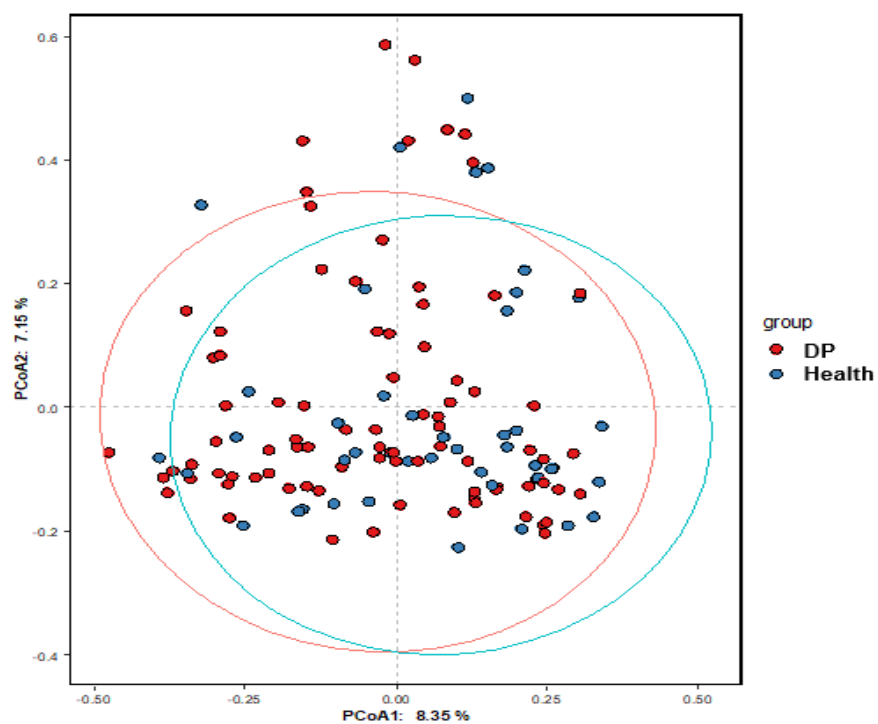

### C. ET-L

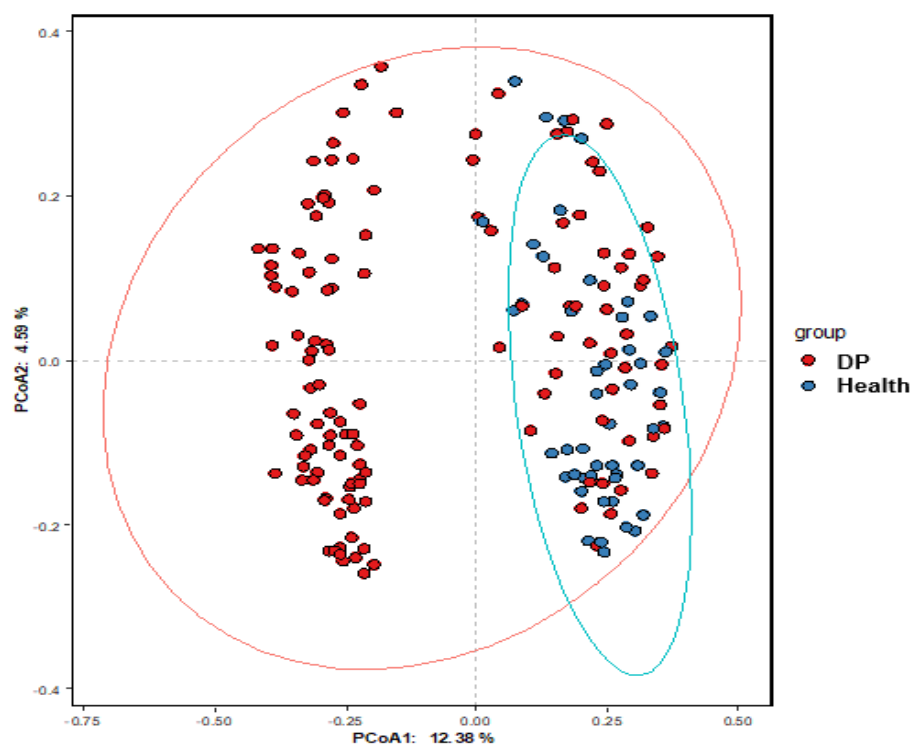

### D. ET-P

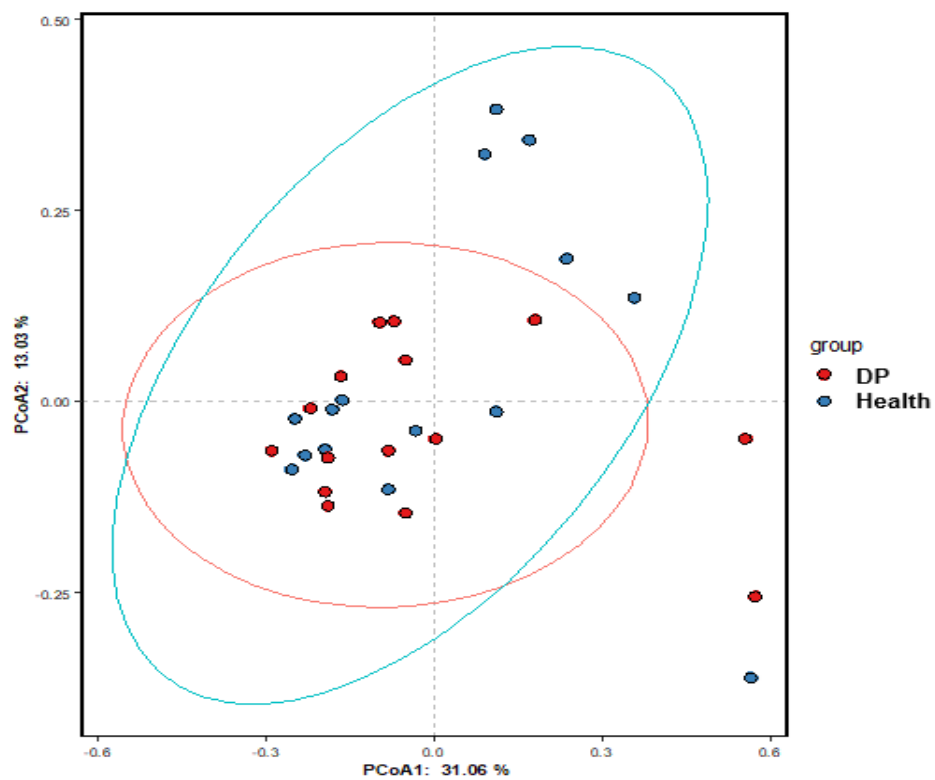



Figure S4. Comparison of the gut microbiota compositions between the Healthy and Depressed (DP) groups in ET-P

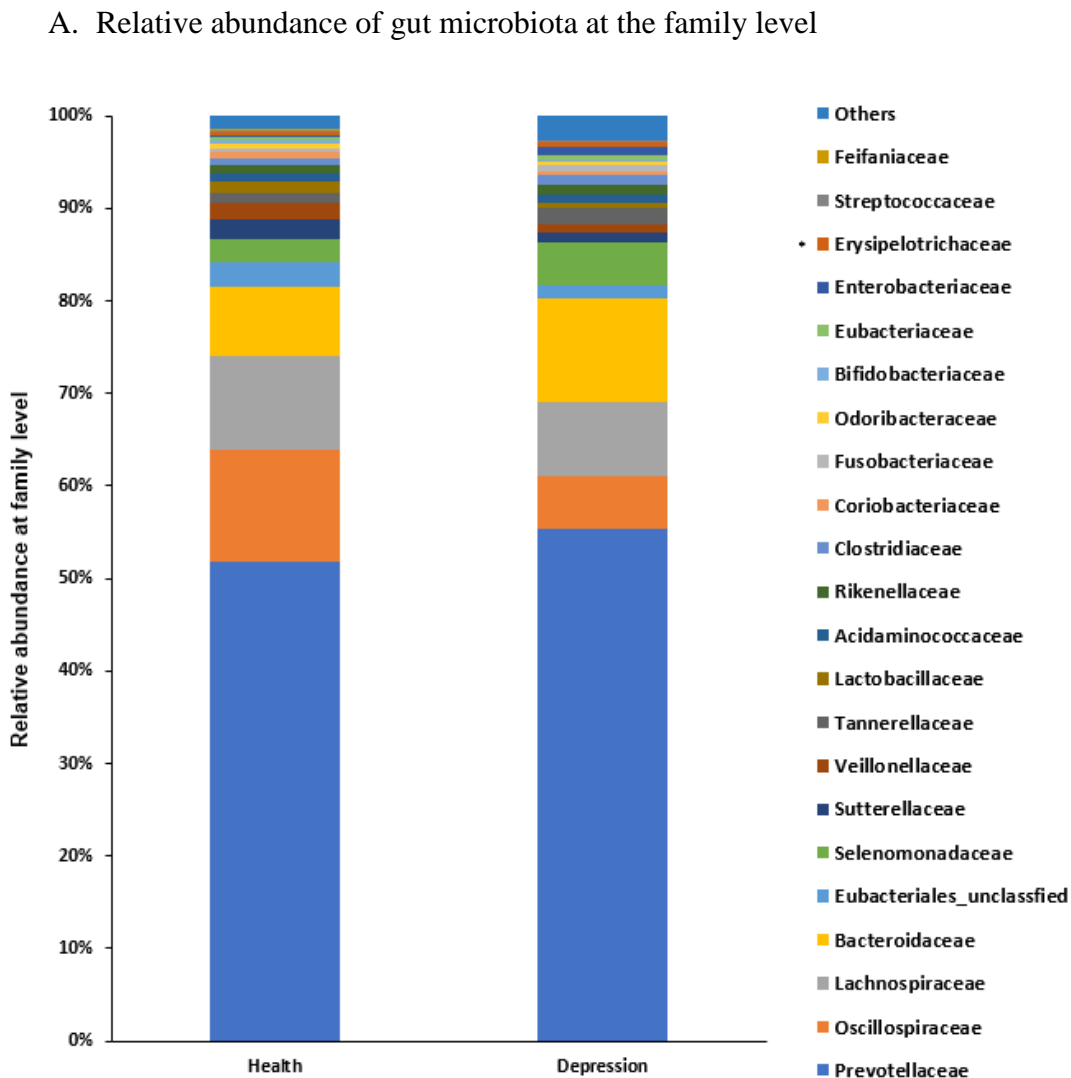

B. Relative abundance of gut microbiota at the genus level

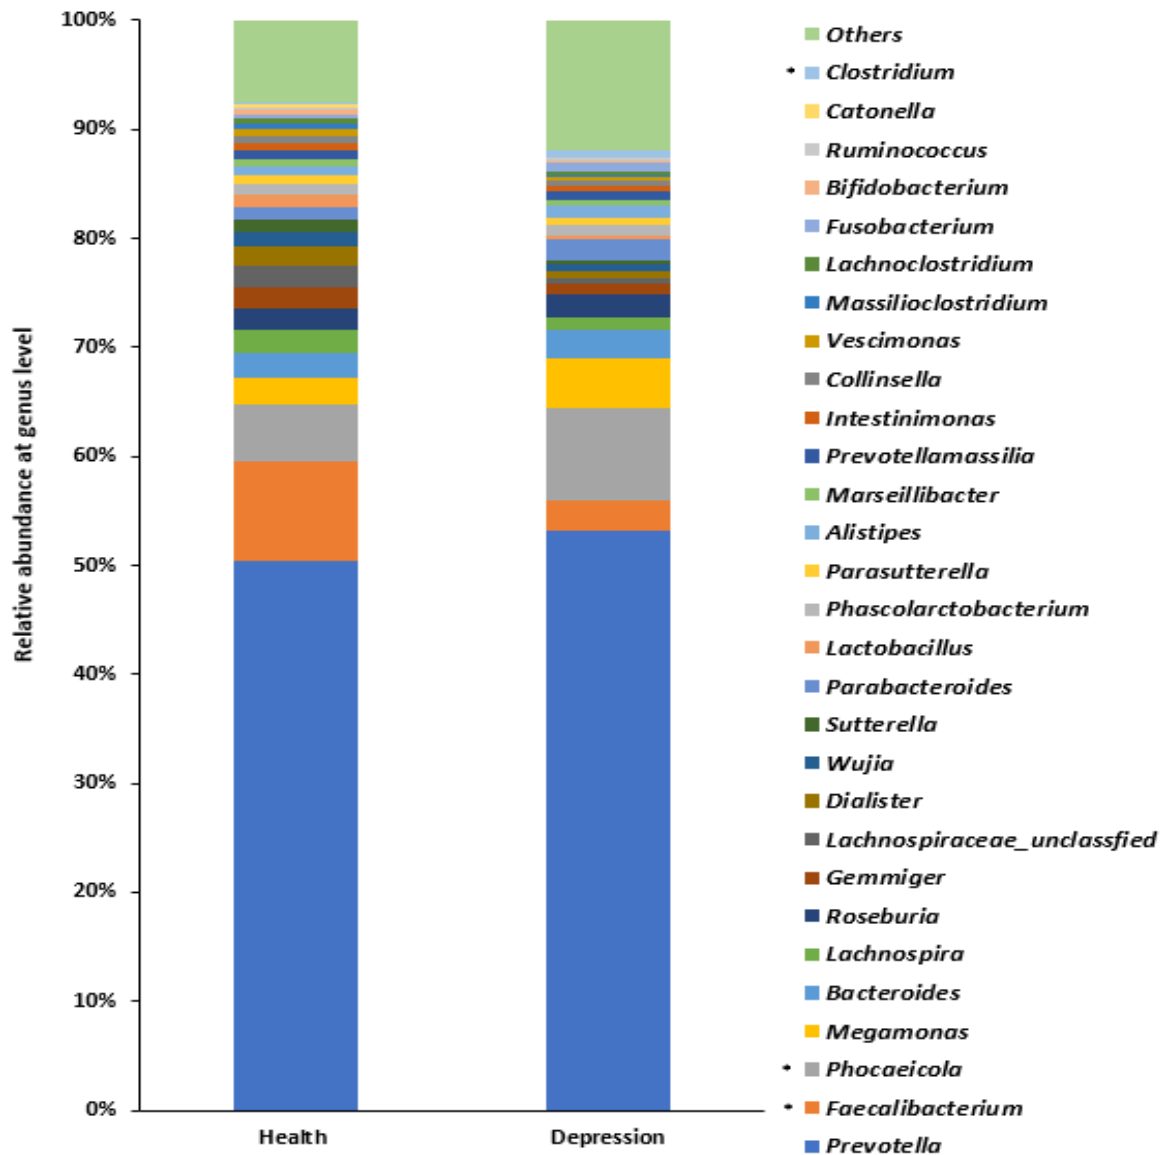

\* Significant differences between the DP and Healthy groups at  $P < 0.00001$  (Bonferroni corrected P value).

Figure S5. Comparison of the gut microbiota composition between the Healthy and Depressed (DP) groups in all participants

A. Relative abundance of gut microbiota at the family level

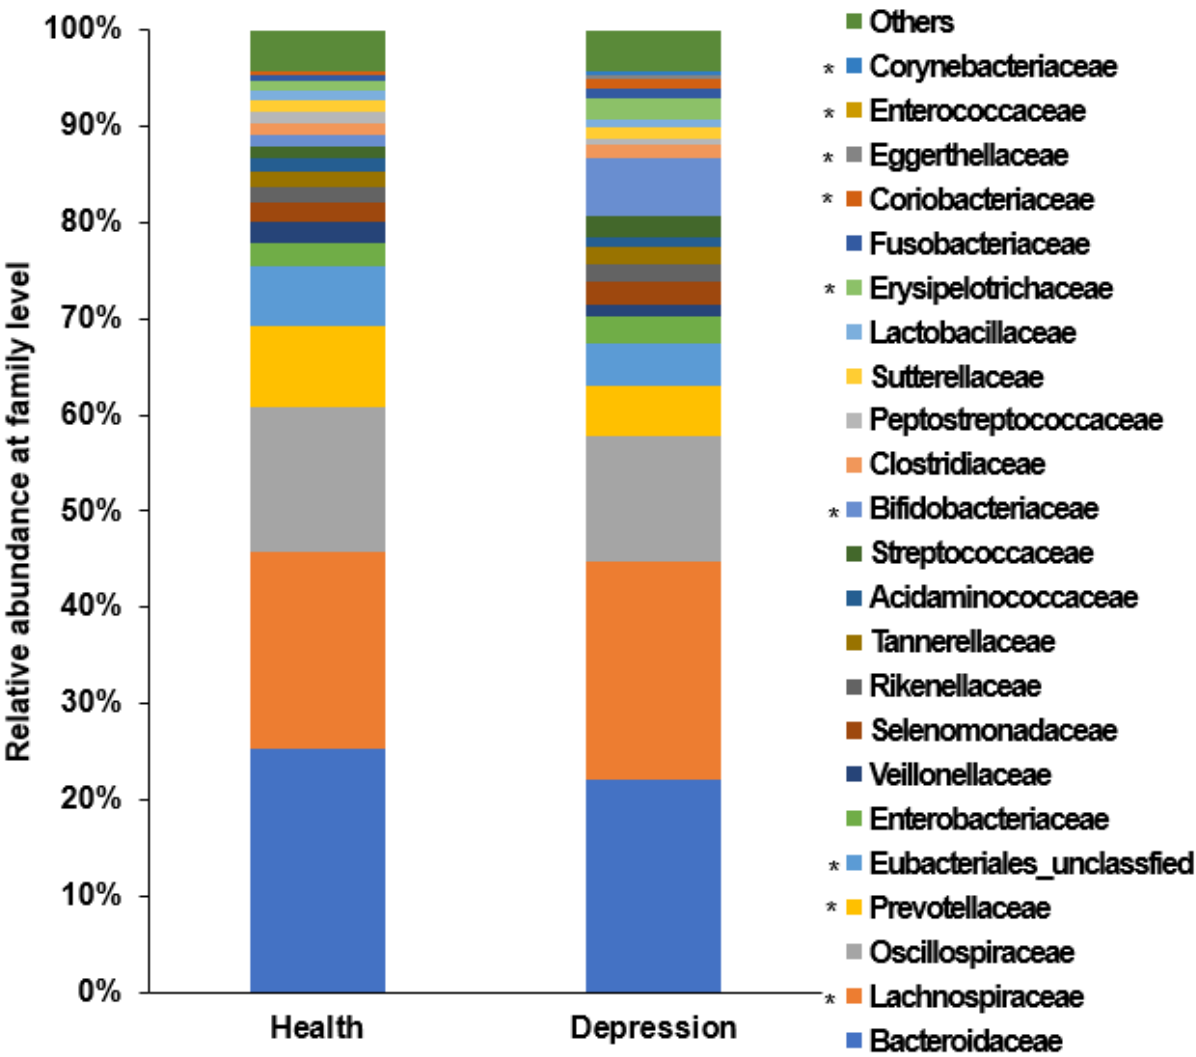

B. Relative abundance of gut microbiota at the genus level

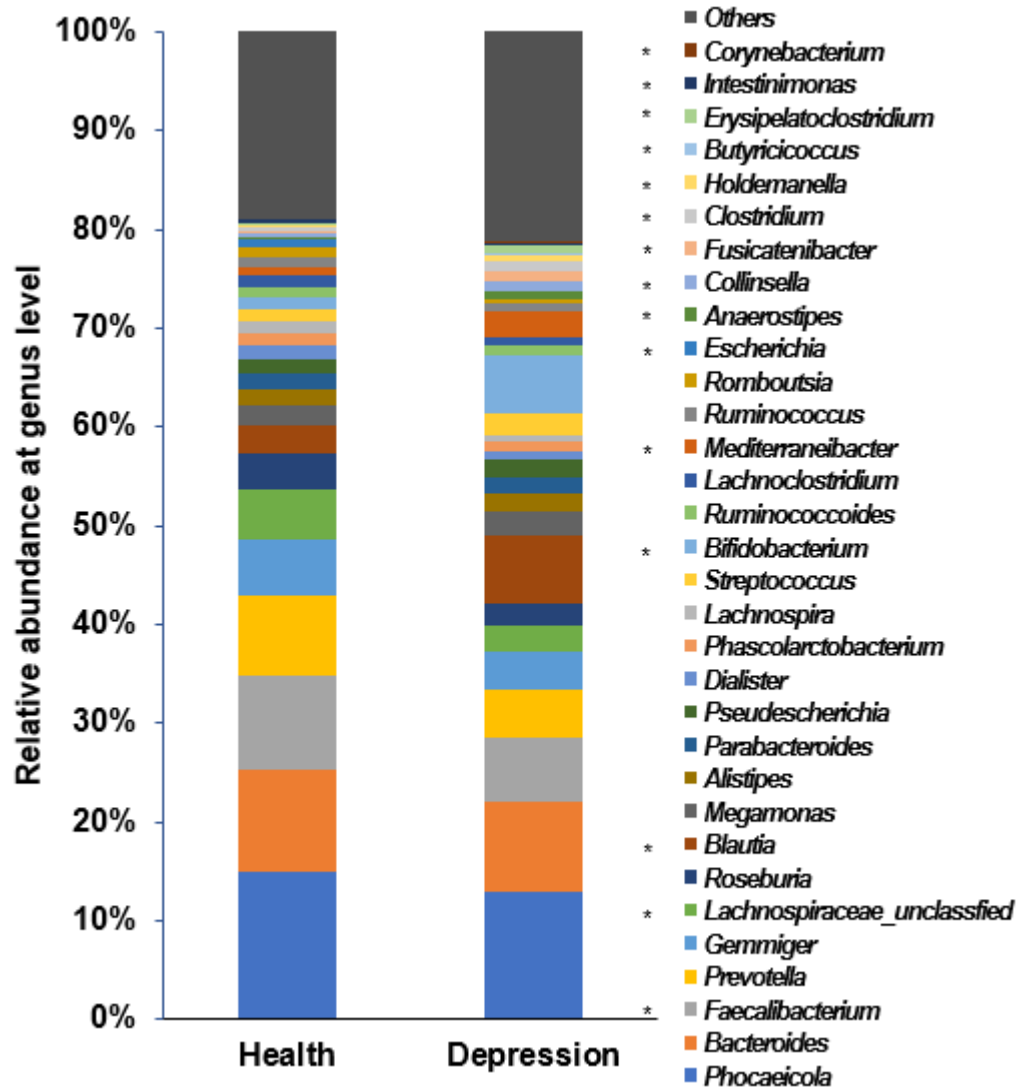

C. Primary gut microbiota in Healthy and DP groups at the species level in ET-B by ALDEx2

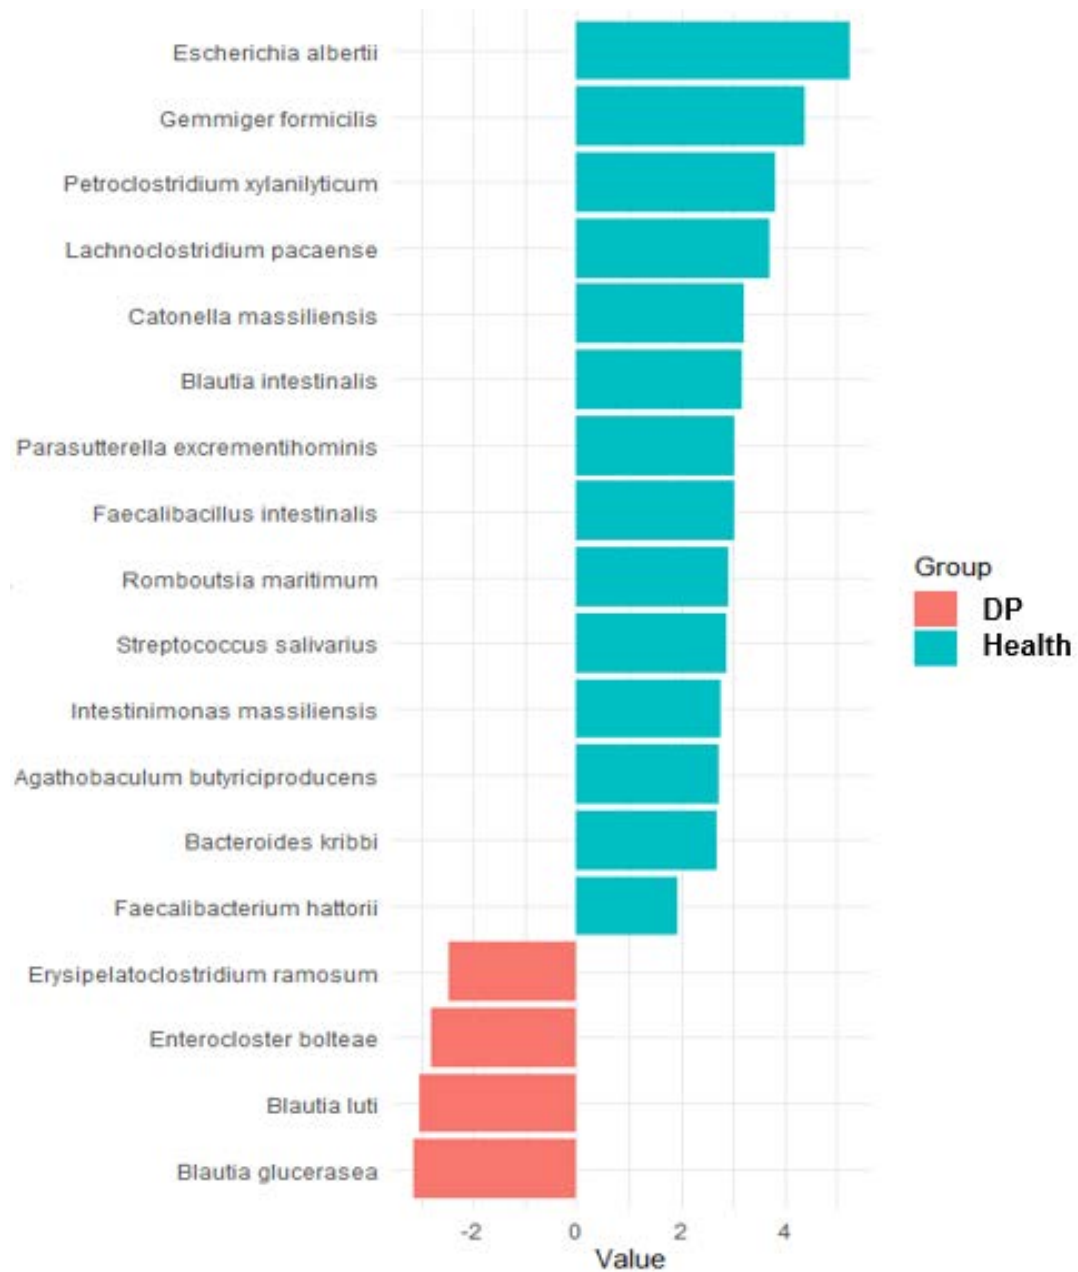

D. Primary gut microbiota in Healthy and DP groups at the species level in ET-B by linear discriminant analysis (LDA) scores

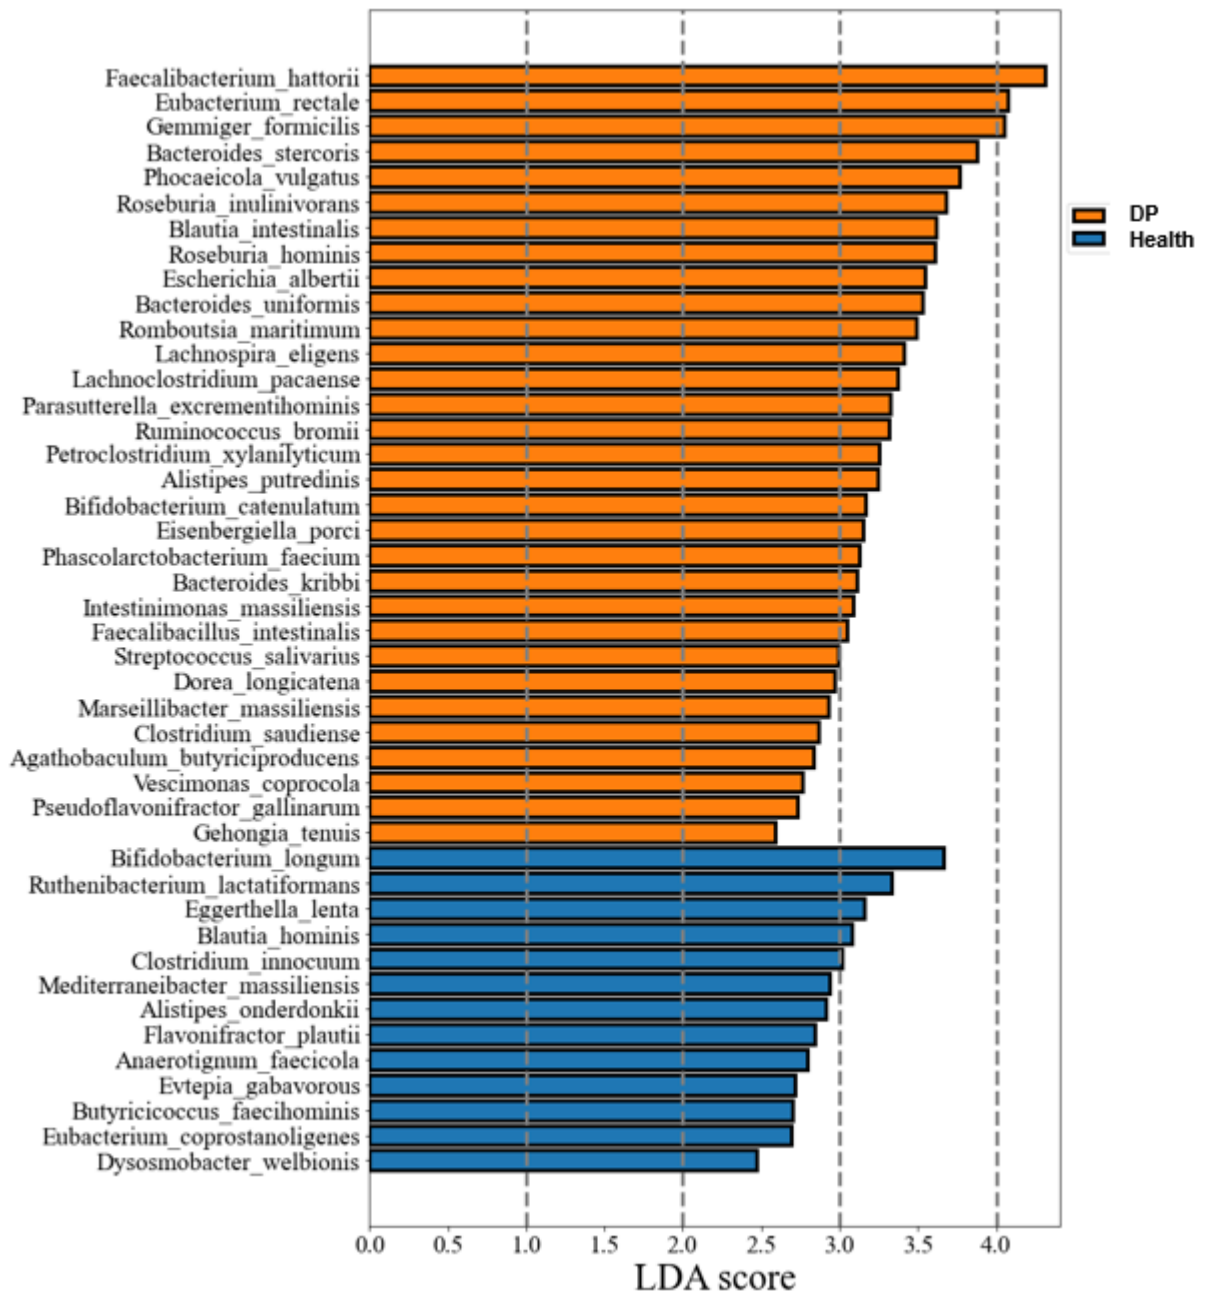

E. Area under receiver operating characteristic

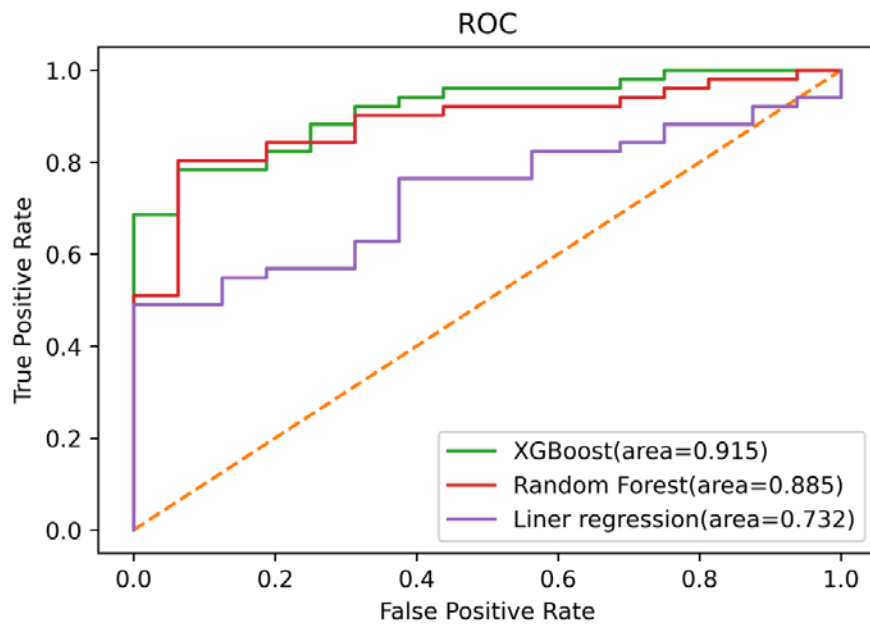

F. Primary gut microbiota in Healthy and DP groups at the species level by the XGBoost algorithm

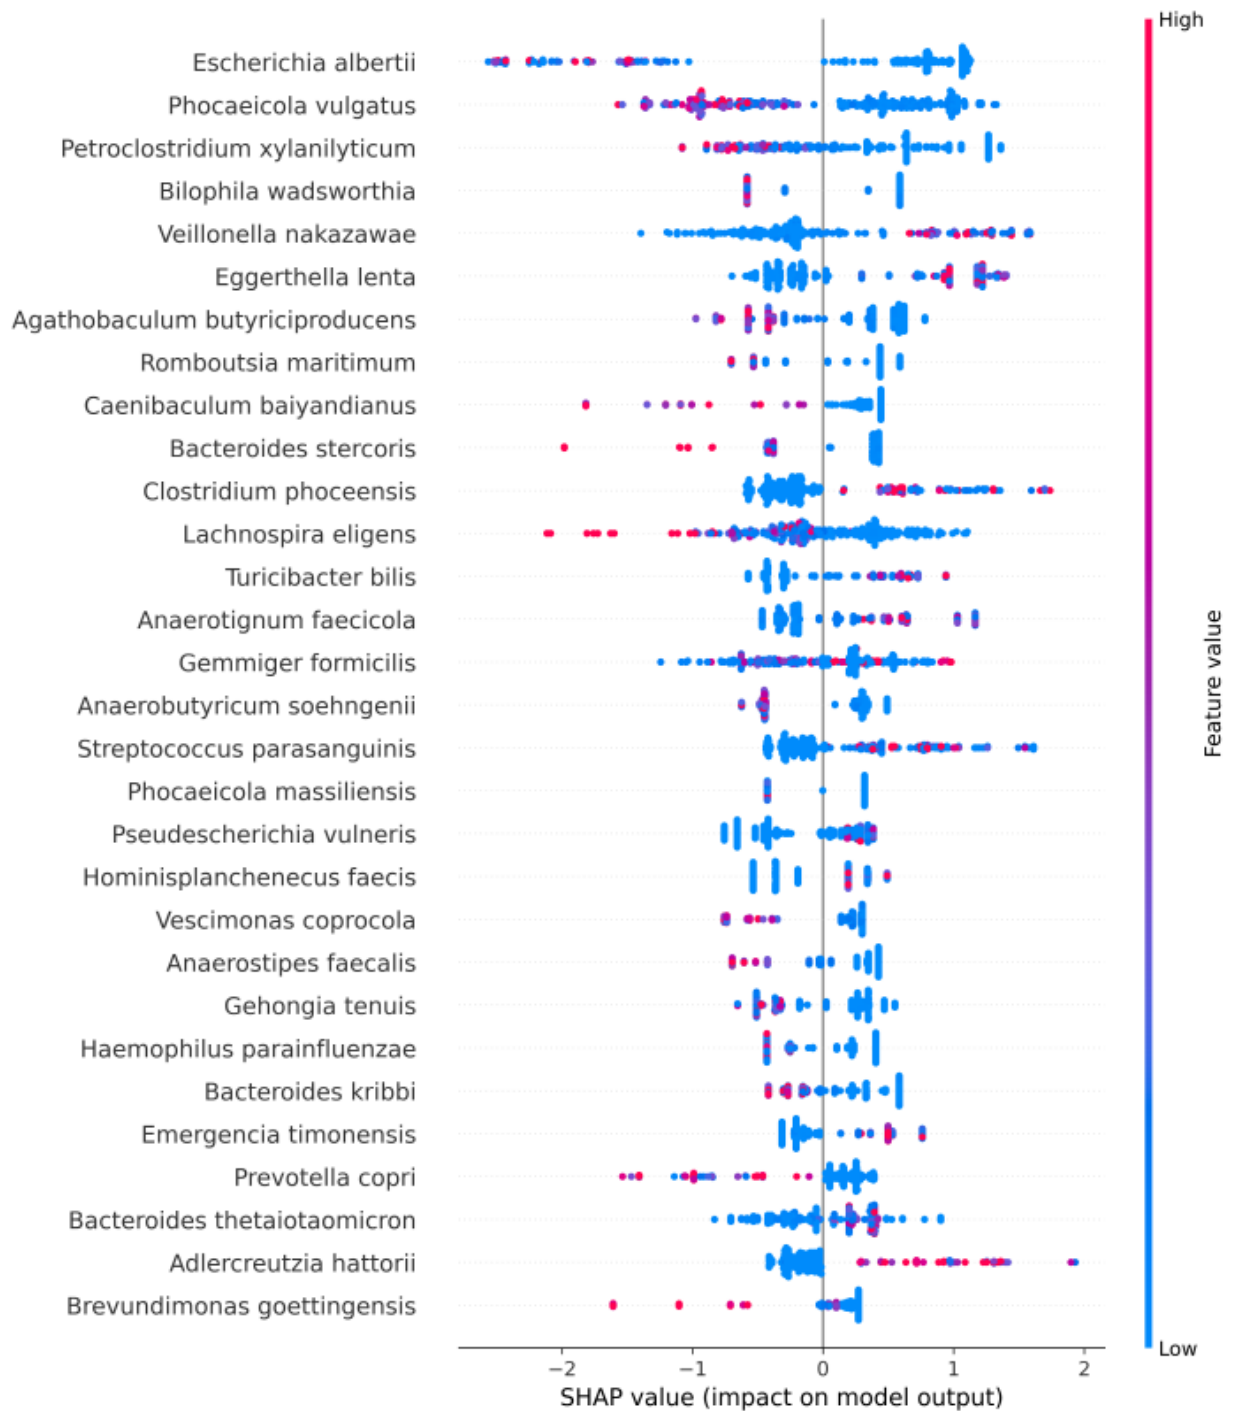

\* Significant differences between the DP and Healthy groups at  $P < 0.00001$  (Bonferroni corrected

P value).



Figure S6. Network of primary gut microbiota in the Healthy and Depressed (DP) groups in ET-B and ET-L

A. Clusters in ET-B

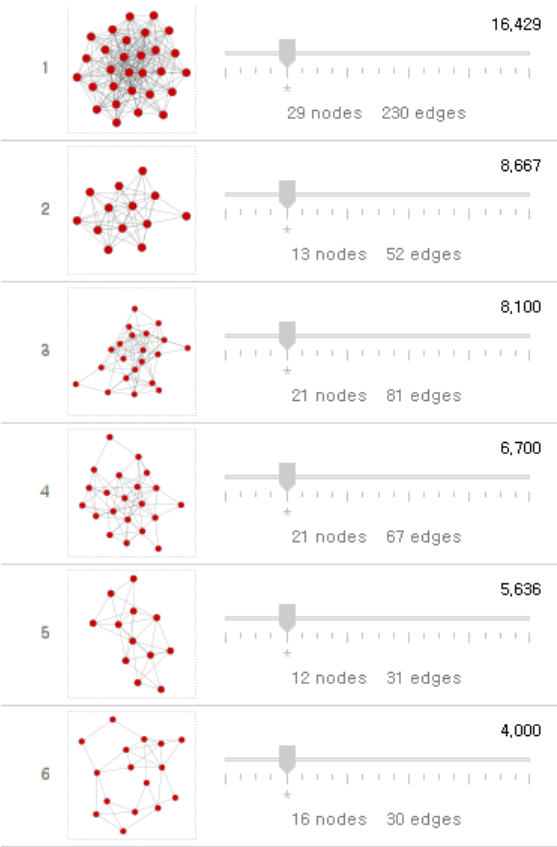

B. Clusters in ET-L

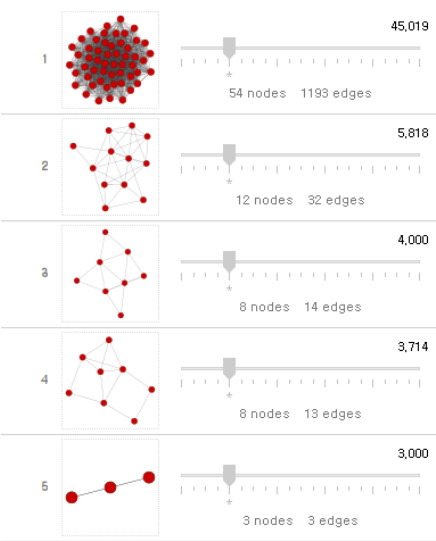

Figure S6. Network of primary gut microbiota in the Healthy and Depressed (DP) groups in all participants

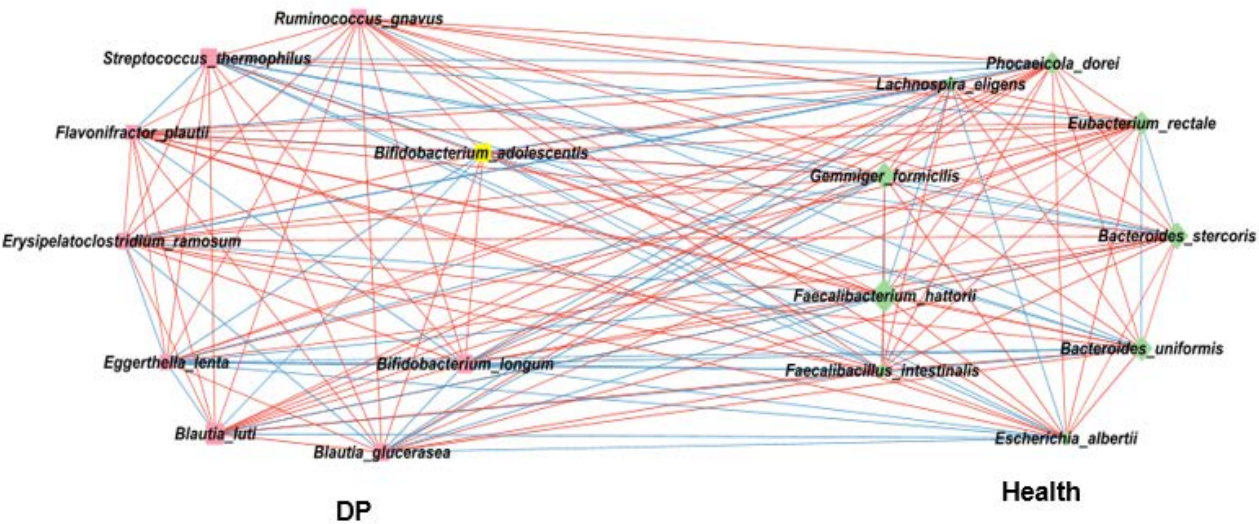

Supplement: s1 [file s1]
